# Supplementary material
Source: PubMed Central journal article supplement (PMC3538905)
Supplement: NIHMS416088-supplement-Supp_TableS1_FigureS1-S5.pdf [file NIHMS416088-supplement-Supp_TableS1_FigureS1-S5.pdf]

## Supplementary Information

### Trs130 participates in autophagy through GTPases Ypt31/32 in

#### *Saccharomyces cerevisiae*

Zou *et al.*,

**Table S1. Yeast strains and plasmids used in this study**

#### A. Strains

| Strain  | Alias                                   | Genotype                                                                                                                       | Source     |
|---------|-----------------------------------------|--------------------------------------------------------------------------------------------------------------------------------|------------|
| NSY991  | VSY459,<br>TRS130                       | <i>MATa leu2-3,112 his3-Δ200 trp1-Δ901<br/>lys2-801 suc2-Δ9 ura3-52<br/>TRS130-HA::HIS3MX6</i>                                 | (1)        |
| NSY992  | <i>trs130ts</i>                         | <i>MATa leu2-3,112 his3-Δ200 trp1-Δ901<br/>lys2-801 suc2-Δ9 ura3-52 trs130-(33 aa<br/>truncation)-HA<sup>ts</sup>::HIS3MX6</i> | (1)        |
| YLY2360 | GFP-Atg8<br>TRS130                      | NSY991, <i>GFP-ATG8::URA3</i>                                                                                                  | This study |
| YLY2361 | GFP-Atg8<br><i>trs130ts</i>             | NSY992, <i>GFP-ATG8::URA3</i>                                                                                                  | This study |
| YLY2741 | GFP-Atg8<br>RFP-Ape1<br>TRS130          | NSY991,<br><i>GFP-Atg8::URA3,RFP-APE1::LEU2</i>                                                                                | This study |
| YLY2742 | GFP-Atg8<br>RFP-Ape1<br><i>trs130ts</i> | NSY992,<br><i>GFP-ATG8::URA3,RFP-APE1::LEU2</i>                                                                                | This study |
| YLY4081 | TRS130<br><i>trs85Δ</i>                 | YLY2741, <i>trs85Δ::Kan</i>                                                                                                    | This study |
| YLY4083 | <i>trs130ts</i><br><i>trs85Δ</i>        | YLY2742, <i>trs85Δ::Kan</i>                                                                                                    | This study |
| YLY3661 | TRS130<br><i>atg1Δ</i>                  | YLY2741, <i>atg1Δ::Kan</i>                                                                                                     | This study |
| YLY3662 | <i>trs130ts</i><br><i>atg1Δ</i>         | YLY2742, <i>atg1Δ::Kan</i>                                                                                                     | This study |
| NSY1176 | Trs130-HA<br>Trs120-myc                 | <i>MATa leu2-3,112 his3-Δ200 trp1-Δ901<br/>lys2-801 suc2-Δ9 ura3-52<br/>TRS130-HA::HIS3MX6 TRS120-myc::TRP1</i>                | (2)        |
| NSY1177 | <i>trs65ts</i>                          | NSY1176, <i>trs65Δ::Kan</i>                                                                                                    | (2)        |
| YLY2483 | GFP-Atg8<br>TRS65                       | NSY1176, <i>GFP-ATG8::URA3</i>                                                                                                 | This study |

|         |                                        |                                                                                                                         |            |
|---------|----------------------------------------|-------------------------------------------------------------------------------------------------------------------------|------------|
| YLY2484 | GFP-Atg8<br><i>trs65ts</i>             | NSY1177, <i>GFP-ATG8::URA3</i>                                                                                          | This study |
| YLY2851 | GFP-Atg8<br>RFP-Ape1<br>TRS65          | NSY1176,<br><i>GFP-ATG8::URA3,RFP-APE1::LEU2</i>                                                                        | This study |
| YLY2852 | GFP-Atg8<br>RFP-Ape1<br><i>trs65ts</i> | NSY1177,<br><i>GFP-ATG8::URA3,RFP-APE1::LEU2</i>                                                                        | This study |
| YLY4504 | GFP-Atg8<br>RFP-Ape1<br><i>tca17ts</i> | YLY2851, <i>tca17Δ::Kan</i>                                                                                             | This study |
| YLY3362 | TRS130<br><i>atg11Δ</i>                | YLY2741, <i>atg11Δ::Hyg</i>                                                                                             | This study |
| YLY3365 | <i>trs130ts</i><br><i>atg11Δ</i>       | YLY2742, <i>atg11Δ::Hyg</i>                                                                                             | This study |
| YLY3331 | TRS130<br><i>atg17Δ</i>                | YLY2741, <i>atg17Δ::Kan</i>                                                                                             | This study |
| YLY3334 | <i>trs130ts</i><br><i>atg17Δ</i>       | YLY2742, <i>atg17Δ::Kan</i>                                                                                             | This study |
| YLY3126 | TRS130<br><i>atg5Δ</i>                 | YLY2741, <i>atg5Δ::Hyg</i>                                                                                              | This study |
| YLY3127 | <i>trs130ts</i><br><i>atg5Δ</i>        | YLY2742, <i>atg5Δ::Hyg</i>                                                                                              | This study |
| YLY4205 | TRS130<br><i>Atg13Δ</i>                | YLY2741, <i>atg13Δ::Hyg</i>                                                                                             | This study |
| YLY4208 | <i>trs130ts</i><br><i>atg13Δ</i>       | YLY2742, <i>atg13Δ::Hyg</i>                                                                                             | This study |
| YLY4068 | TRS130<br><i>Atg9Δ</i>                 | YLY2741, <i>atg9Δ::Hyg</i>                                                                                              | This study |
| YLY4071 | <i>trs130ts</i><br><i>atg9Δ</i>        | YLY2742, <i>atg9Δ::Hyg</i>                                                                                              | This study |
| YLY3212 | TRS130<br><i>atg14Δ</i>                | YLY2741, <i>atg14Δ::Hyg</i>                                                                                             | This study |
| YLY3213 | <i>trs130ts</i><br><i>atg14Δ</i>       | YLY2742, <i>atg14Δ::Hyg</i>                                                                                             | This study |
| YLY4462 | TRS33                                  | <i>MAT a ura3-52 leu2-3,112 trp1-Δ901<br/>lys2-801 his3-Δ200, TRS130-HA::HIS3MX6,<br/>GFP-Atg8::URA3,RFP-APE1::LEU2</i> | This study |
| YLY4464 | <i>trs33Δ</i>                          | YLY4462, <i>trs33Δ::Hyg</i>                                                                                             | This study |
| YLY4431 | TRS120                                 | SEY6210, <i>TRS130-myc::TRP1</i> +<br>pRS425-YPT31,<br><i>GFP-Atg8::URA3,RFP-APE1::LEU2</i>                             | This study |

|         |                                                         |                                                                                                                    |            |
|---------|---------------------------------------------------------|--------------------------------------------------------------------------------------------------------------------|------------|
| YLY4021 | <i>trs120Δ</i>                                          | SEY6210, <i>trs120::HIS3MX6</i><br><i>TRS130-myc::TRP1</i> + pRS425-YPT31,<br><i>GFP-Atg8::URA3,RFP-APE1::LEU2</i> | This study |
| YLY2705 | Atg9-GFP<br>RFP-Ape1<br>TRS130                          | NSY991,<br><i>ATG9-3XGFP::URA3,RFP-APE1::LEU2</i>                                                                  | This study |
| YLY2704 | Atg9-GFP<br>RFP-Ape1<br><i>trs130ts</i>                 | NSY992,<br><i>ATG9-3XGFP::URA3,RFP-APE1::LEU2</i>                                                                  | This study |
| YLY2978 | Atg9-GFP<br>RFP-Ape1<br>TRS130<br><i>atg1Δ</i>          | YLY2705, <i>atg1Δ::Kan</i>                                                                                         | This study |
| YLY2979 | Atg9-GFP<br>RFP-Ape1<br><i>trs130ts</i><br><i>atg1Δ</i> | YLY2704, <i>atg1Δ::Kan</i>                                                                                         | This study |
| YLY2710 | Atg9-GFP<br>RFP-Ape1<br>TRS65                           | NSY1176,<br><i>ATG9-3XGFP::URA3,RFP-APE1::LEU2</i>                                                                 | This study |
| YLY2870 | Atg9-GFP<br>RFP-Ape1<br><i>trs65ts</i>                  | YLY2710, <i>trs65Δ::Hyg</i>                                                                                        | This study |
| YLY2746 | Atg9-GFP<br>RFP-Ape1<br>TRS65<br><i>atg1Δ</i>           | YLY2710, <i>atg1Δ::Kan</i>                                                                                         | This study |
| YLY2872 | Atg9-GFP<br>RFP-Ape1<br><i>trs65ts</i><br><i>atg1Δ</i>  | YLY2746, <i>trs65Δ::Hyg</i>                                                                                        | This study |
| YLY2540 | TRS130<br>Sec7-DsRed                                    | NSY991, <i>SEC7-DsRed</i>                                                                                          | This study |
| YLY2541 | <i>trs130ts</i><br>Sec7-DsRed                           | NSY992, <i>SEC7-DsRed</i>                                                                                          | This study |
| YLY2817 | Sec7-DsRed<br>Atg9-3XGFP<br>T RS130                     | YLY2540, <i>ATG9-3XGFP::URA3</i>                                                                                   | This study |
| YLY2818 | Sec7-DsRed<br>Atg9-3XGFP<br><i>trs130ts</i>             | YLY2541, <i>ATG9-3XGFP::URA3</i>                                                                                   | This study |

|         |                                                             |                                                                                  |            |
|---------|-------------------------------------------------------------|----------------------------------------------------------------------------------|------------|
| YLY3091 | Sec7-DsRed<br>Atg9-3XGFP<br>TRS130<br><i>atg1Δ</i>          | YLY2817, <i>atg1Δ::Kan</i>                                                       | This study |
| YLY3092 | Sec7-DsRed<br>Atg9-3XGFP<br><i>trs130ts</i><br><i>atg1Δ</i> | YLY2818, <i>atg1Δ::Kan</i>                                                       | This study |
| YLY2914 | Sec7-DsRed<br>GFP-Atg8<br>TRS130                            | YLY2540, <i>GFP-ATG8::URA3</i>                                                   | This study |
| YLY2917 | Sec7-DsRed<br>GFP-Atg8<br><i>trs130ts</i>                   | YLY2541, <i>GFP-ATG8::URA3</i>                                                   | This study |
| YLY3337 | Sec7-DsRed<br>GFP-Atg8<br>TRS130<br><i>atg1Δ</i>            | YLY2914, <i>atg1Δ::Kan</i>                                                       | This study |
| YLY3339 | Sec7-DsRed<br>GFP-Atg8<br><i>trs130ts</i><br><i>atg1Δ</i>   | YLY2917, <i>atg1Δ::Kan</i>                                                       | This study |
| YLY3359 | TN124                                                       | <i>MATα leu2-3,112 trp1 ura3-52<br/>pho8::pho8Δ60 pho13::LEU2</i>                | (3)        |
| YLY3799 | TRS130<br>(TN124)                                           | TN124, <i>HIS3Δ::Hyg,</i><br><i>TRS130-HA::HIS3MX6</i>                           | This study |
| YLY3800 | <i>trs130ts</i><br>(TN124)                                  | TN124, <i>HIS3Δ::Hyg, trs130-(33 aa<br/>truncation)-HA<sup>ts</sup>::HIS3MX6</i> | This study |
| YLY3956 | <i>atg1Δ</i><br>(TN124)                                     | YLY3799, <i>atg1Δ::Kan</i>                                                       | This study |
| YLY4060 | TRS65<br>(TN124)                                            | TN124, <i>HIS3Δ::Hyg,</i><br><i>TRS130-HA::HIS3MX6 TRS120-myc::TRP1</i>          | This study |
| YLY4140 | <i>trs65ts</i><br>(TN124)                                   | YLY4060, <i>trs65Δ::Kan</i>                                                      | This study |
| NSY1081 | YPT1                                                        | <i>MAT a ura3-52 Leu2 his3</i>                                                   | (2)        |
| NSY1082 | <i>ypt1ts</i>                                               | <i>MAT a ura3-52 Leu2 his3 ypt1Δ136D</i>                                         | (2)        |
| YLY2366 | GFP-Atg8<br>YPT1                                            | NSY1081, <i>GFP-ATG8::URA3</i>                                                   | This study |
| YLY2367 | GFP-Atg8<br><i>ypt1ts</i>                                   | NSY1082, <i>GFP-ATG8::URA3</i>                                                   | This study |

|         |                                              |                                                                                                                         |                  |
|---------|----------------------------------------------|-------------------------------------------------------------------------------------------------------------------------|------------------|
| YLY2417 | GFP-Snc1<br>Sec7-DsRed                       | <i>MAT a leu2-3,112 lys2-801<br/>TRS130-HA::HIS3MX6, GFP-Snc1::URA3,<br/>SEC7-DsRed</i>                                 | This study       |
| YLY2418 | GFP-Snc1<br>Sec7-DsRed                       | <i>MAT a leu2-3,112 lys2-801 trs130-(33 aa<br/>truncation)-HA<sup>ts</sup>::HIS3MX6,<br/>GFP-Snc1::URA3, SEC7-DsRed</i> | This study       |
| RSY367  | SEC7                                         | <i>MATa ade2-1 ura3-1 his3-11,15<br/>leu2-3,112 trp1-Δ1 can1-100</i>                                                    | R. Scheckman lab |
| RSY301  | <i>sec7-4</i>                                | <i>MATa ura3-1 his3-11,15 Leu2-3,112<br/>trp1-Δ1</i>                                                                    | R. Scheckman lab |
| YLY4478 | SEC7<br>GFP-Atg8                             | RSY367, <i>TRS130-HA::HIS3MX6,<br/>GFP-ATG8::URA3</i>                                                                   | This study       |
| YLY4479 | <i>trs130ts</i><br>GFP-Atg8                  | RSY367, <i>trs130-(33 aa truncation)-<br/>HA<sup>ts</sup>::HIS3MX6, GFP-ATG8::URA3</i>                                  | This study       |
| YLY4480 | <i>sec7-4</i><br>GFP-Atg8                    | RSY301, <i>TRS130-HA::HIS3MX6,<br/>GFP-ATG8::URA3</i>                                                                   | This study       |
| YLY4481 | <i>sec7-4</i><br><i>trs130ts</i><br>GFP-Atg8 | RSY301, <i>trs130-(33 aa truncation)-<br/>HA<sup>ts</sup>::HIS3MX6, GFP-ATG8::URA3</i>                                  | This study       |
| YLY40   | NSY128                                       | <i>MATa ade2 his3-200 leu2-3,112 lys2-801<br/>ura3-52</i>                                                               | (4)              |
| YLY44   | NSY340<br><i>ypt31Δ</i><br><i>ypt32ts</i>    | <i>MATa leu2-3,112 lys2-801 ura3-52<br/>ypt31Δ::HIS3 ypt32A141D</i>                                                     | (4)              |

## B. Plasmids

| Plasmid                     | Alias  | Genotype                           | Source     |
|-----------------------------|--------|------------------------------------|------------|
| p1K-GFP- <i>ATG8</i> -406   | pYL233 |                                    | (5)        |
| <i>RFP-APE1</i> -305        | pYL238 |                                    | (6)        |
| <i>ATG9-3XGFP</i> -PG5      | pYL242 |                                    | (7)        |
| Cu-Cherry- <i>ATG8</i> -415 | pYL254 |                                    | (8)        |
| pNS180                      | pRS425 | 2μ, <i>LEU3</i> , Amp <sup>r</sup> | (9)        |
| pNS781                      | Ypt31  | pRS425- <i>YPT31</i>               | (1)        |
| pYL316                      | Ypt31S | pRS425- <i>YPT31</i> S27N          | This study |
| pYL313                      | Ypt31Q | pRS425- <i>YPT31</i> Q72L          | This study |
| pYL317                      | Ypt1   | pRS425- <i>YPT1</i>                | This study |
| pYL120                      | pRS426 | 2μ, <i>URA3</i> , Amp <sup>r</sup> | (9)        |

|        |        |                           |            |
|--------|--------|---------------------------|------------|
| pYL335 |        | pRS426-Ypt31              | This study |
| pYL338 |        | pRS426- <i>YPT31</i> S27N | This study |
| pYL336 |        | pRS426- <i>YPT31</i> Q72L | This study |
| pYL339 |        | pRS426- <i>YPT1</i>       | This study |
| pYL151 | YEp351 | 2 $\mu$ , <i>LEU2</i>     | (10)       |
| pYL152 |        | YEp351- <i>TRS130</i>     | This study |
| pYL283 |        | YEp351- <i>YPT32</i>      | This study |
| pYL225 |        | YEp351- <i>TRS65</i>      | This study |
| pYL342 |        | YEp351- <i>TCA17</i>      | This study |

## Supplementary Materials and Methods

### Growth assay of genetic interaction

For genetic interaction assays, cultures were grown overnight at 26°C in minimal medium (SD-Leu), normalized to the same density and spotted onto SD-Leu plates in serial dilutions of 1:10. Plates were incubated at various temperatures for different numbers of days and photographed.

## References

1. Sciorra VA, Audhya A, Parsons AB, Segev N, Boone C, Emr SD. Synthetic genetic array analysis of the PtdIns 4-kinase Pik1p identifies components in a Golgi-specific Ypt31/rab-GTPase signaling pathway. *Mol Biol Cell* 2005;16(2):776-793.
2. Liang Y, Morozova N, Tokarev AA, Mulholland JW, Segev N. The role of Trs65 in the Ypt/Rab guanine nucleotide exchange factor function of the TRAPP II complex. *Mol Biol Cell* 2007;18(7):2533-2541.
3. Noda T, Matsuura A, Wada Y, Ohsumi Y. Novel system for monitoring autophagy in the yeast *Saccharomyces cerevisiae*. *Biochem Biophys Res Commun* 1995;210(1):126-132.
4. Jones S, Jedd G, Kahn RA, Franzusoff A, Bartolini F, Segev N. Genetic interactions in yeast between Ypt GTPases and Arf guanine nucleotide exchangers. *Genetics* 1999;152(4):1543-1556.
5. Xie Z, Nair U, Klionsky DJ. Atg8 controls phagophore expansion during autophagosome formation. *Mol Biol Cell* 2008;19(8):3290-3298.
6. Shintani T, Reggiori F. Fluorescence microscopy-based assays for monitoring yeast Atg protein trafficking. *Methods Enzymol* 2008;451:43-56.
7. Monastyrska I, He C, Geng J, Hoppe AD, Li Z, Klionsky DJ. Arp2 links autophagic machinery with the actin cytoskeleton. *Mol Biol Cell* 2008;19(5):1962-1975.
8. Mari M, Griffith J, Rieter E, Krishnappa L, Klionsky DJ, Reggiori F. An Atg9-containing compartment that functions in the early steps of autophagosome biogenesis. *J Cell Biol* 2010;190(6):1005-1022.
9. Christianson TW, Sikorski RS, Dante M, Shero JH, Hieter P. Multifunctional yeast high-copy-number shuttle vectors. *Gene* 1992;110(1):119-122.
10. Yamamoto K, Jigami Y. Mutation of TRS130, which encodes a component of the TRAPP II complex, activates transcription of OCH1 in *Saccharomyces cerevisiae*. *Curr Genet* 2002;42(2):85-93.

Figure S1

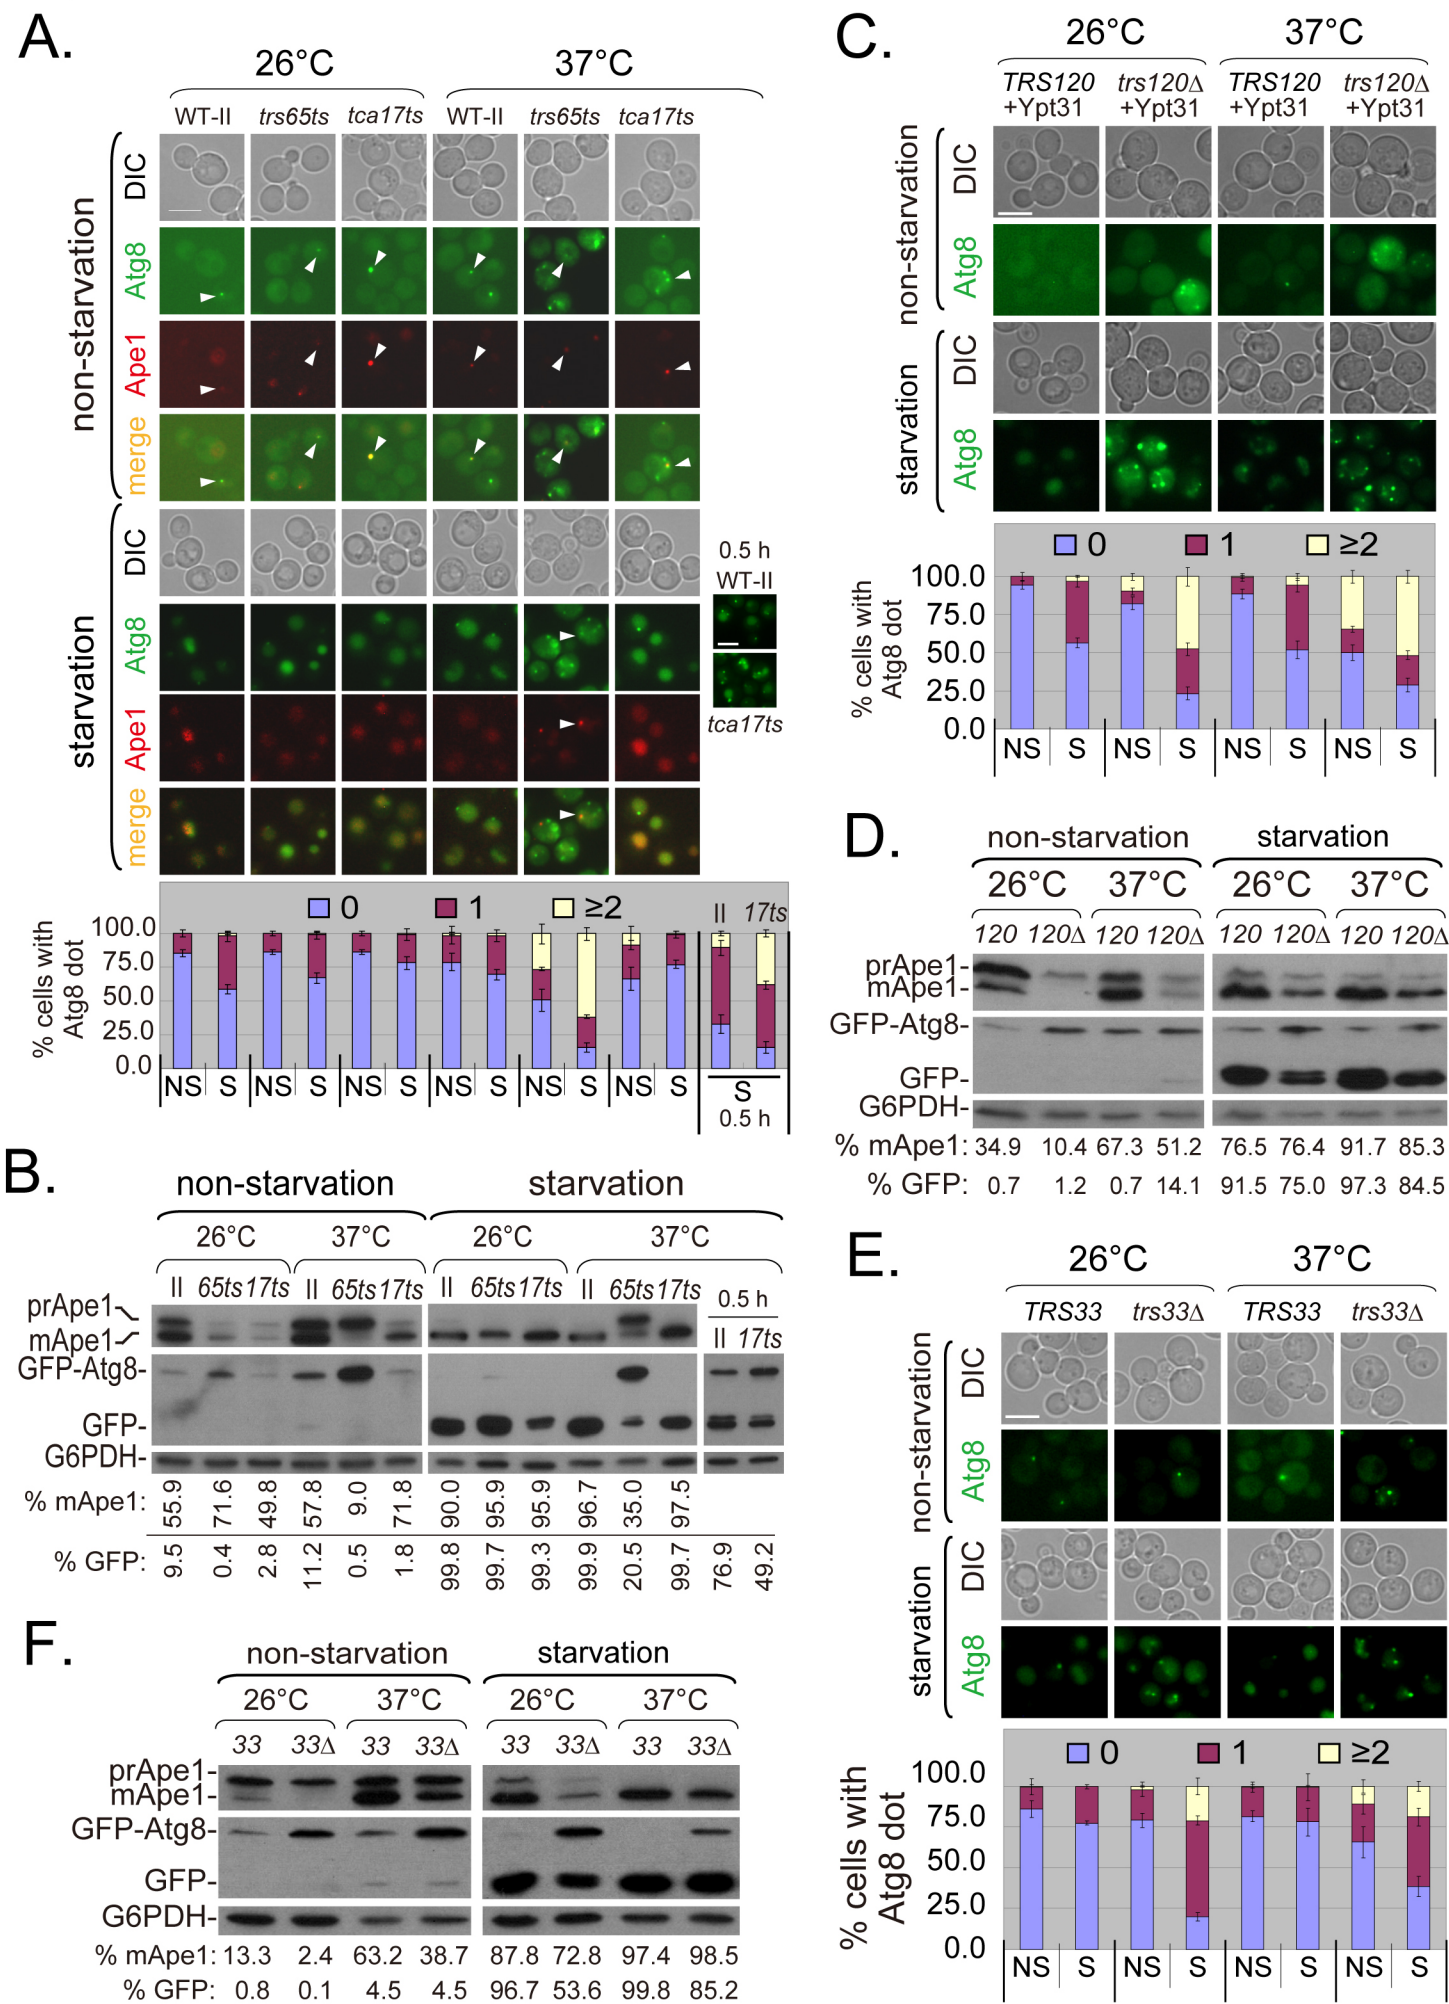

**Figure S1. Cvt pathway and starvation-induced autophagy are impaired in other TRAPP II-specific subunit mutants at the restrictive temperature. (A)** Atg8 and Ape1 localization in *trs65ts* and *tca17ts* mutant cells. WT-II (for indicating TRAPP II-specific subunits Trs130 and Trs120 are tagged as Trs130-HA Trs120-myc) and mutant cells were tagged using GFP-Atg8 and RFP-Ape1 integration plasmids. Cells were grown and treated as in [Figure 1A](#). GFP-Atg8 morphology of WT-II and *tca17ts* cells starved for 0.5 hour at 37°C is at right. Arrowheads indicate colocalization of Atg8 and Ape1. Bar, 5  $\mu$ m. The percentage of cells with Atg8 dots was quantitated and presented as in [Figure 1A](#). **(B)** Ape1 maturation was blocked under non-starvation conditions and GFP-Atg8 degradation was reduced under starvation conditions in *trs65ts* mutant cells at 37°C. Cells grown as in (A) but in YPD were subjected to immunoblot assay, quantitated and presented as in [Figure 1B](#). II for WT-II as in (A). **(C)-(F)**: GFP-Atg8 localization in the *trs120* $\Delta$  mutant (*trs120* $\Delta$ +Ypt31) **(C)** and the *trs33* $\Delta$  mutant (*trs33* $\Delta$  in Trs130-HA background) (Trs33 was a candidate for TRAPP II-specific subunit in this study) **(E)**; immunoblot assay for autophagy defects in *trs120* $\Delta$  mutant **(D)** and *trs33* $\Delta$  mutant **(F)**. Experiments were done as in (A) and (B).

Figure S2

A.

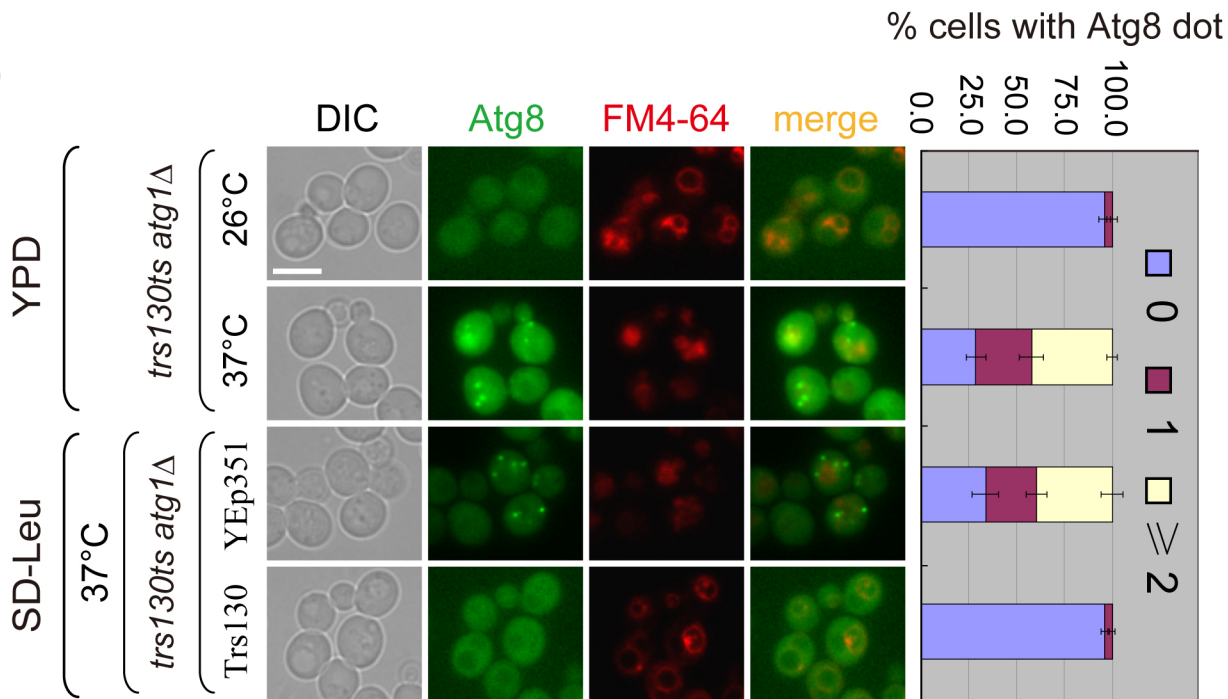

B. SD-Ura, 37°C

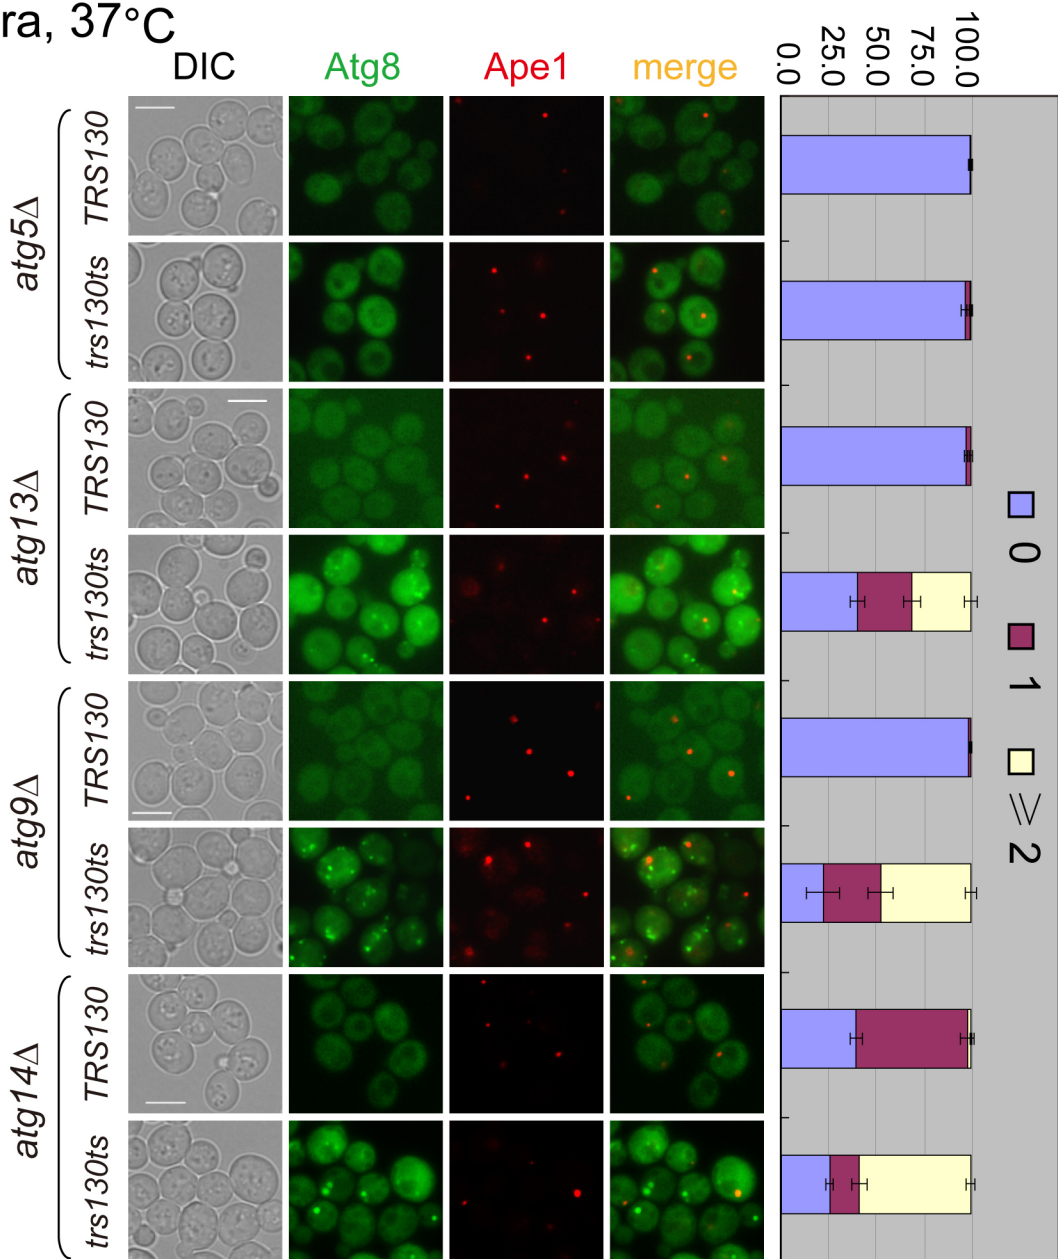

**Figure S2. Localization of Atg8 in *trs130ts* mutants with deletion of *ATG* genes without starvation.** **(A)** Multiple GFP-Atg8 dots were formed in *trs130ts atg1Δ* without starvation at the restrictive temperature; this was rescued by Trs130. Cells grown in rich medium (YPD or SD-Leu) to mid-log phase at 26°C were treated as in [Figure 1A](#) for non-starvation and stained with FM4-64 during the last hour to detect the vacuole. Bar, 5 μm. **(B)** Yeast strains were grown and treated as described in [Figure 3B](#) except that incubation was in SD-Ura for 1.5 hours at 37°C without starvation. Cells were examined by live microscopy imaging for changes in GFP-Atg8 and RFP-Ape1. Bar, 5 μm. The percentage of cells with Atg8 dots was quantitated and presented as in [Figure 1A](#).

Figure S3

A. SD-Ura

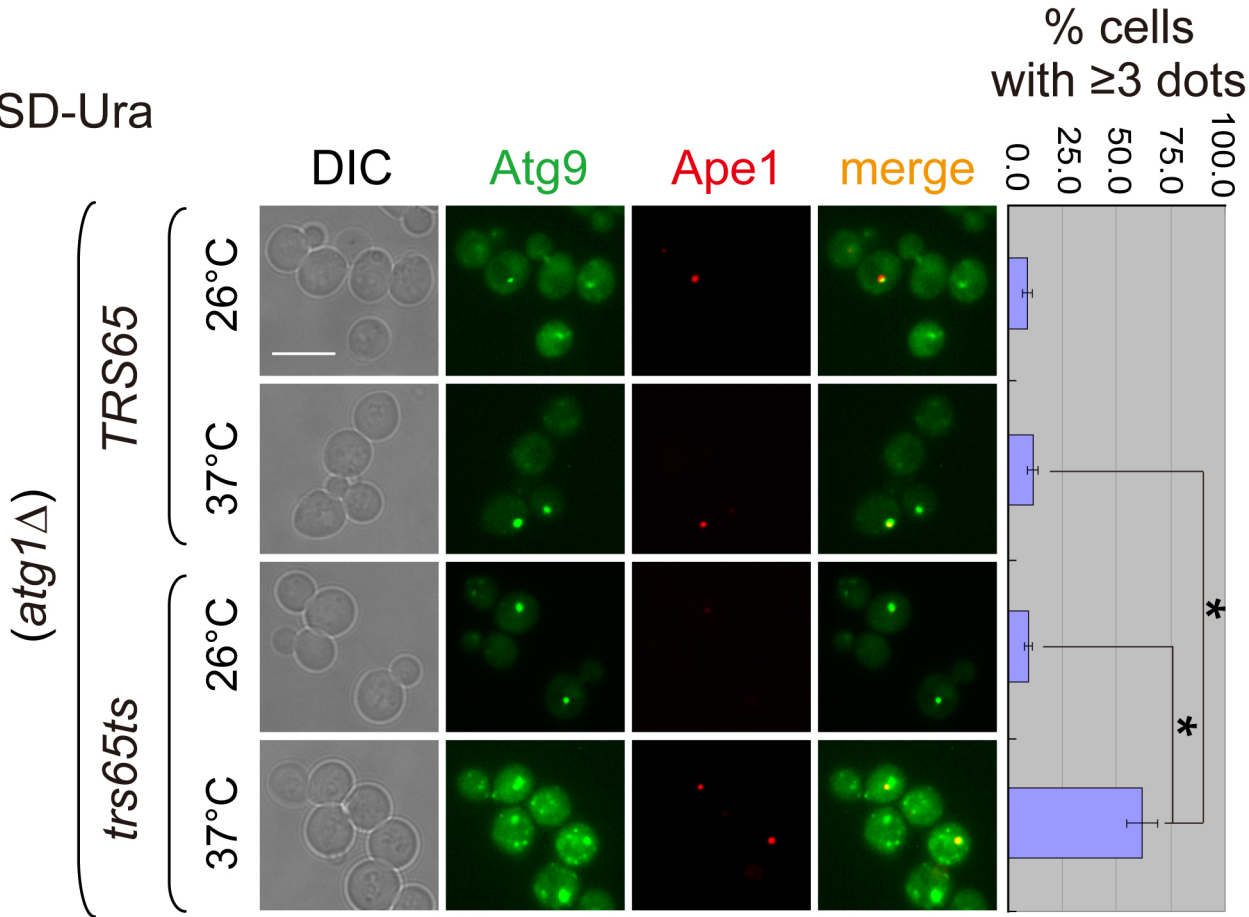

B. SD-N

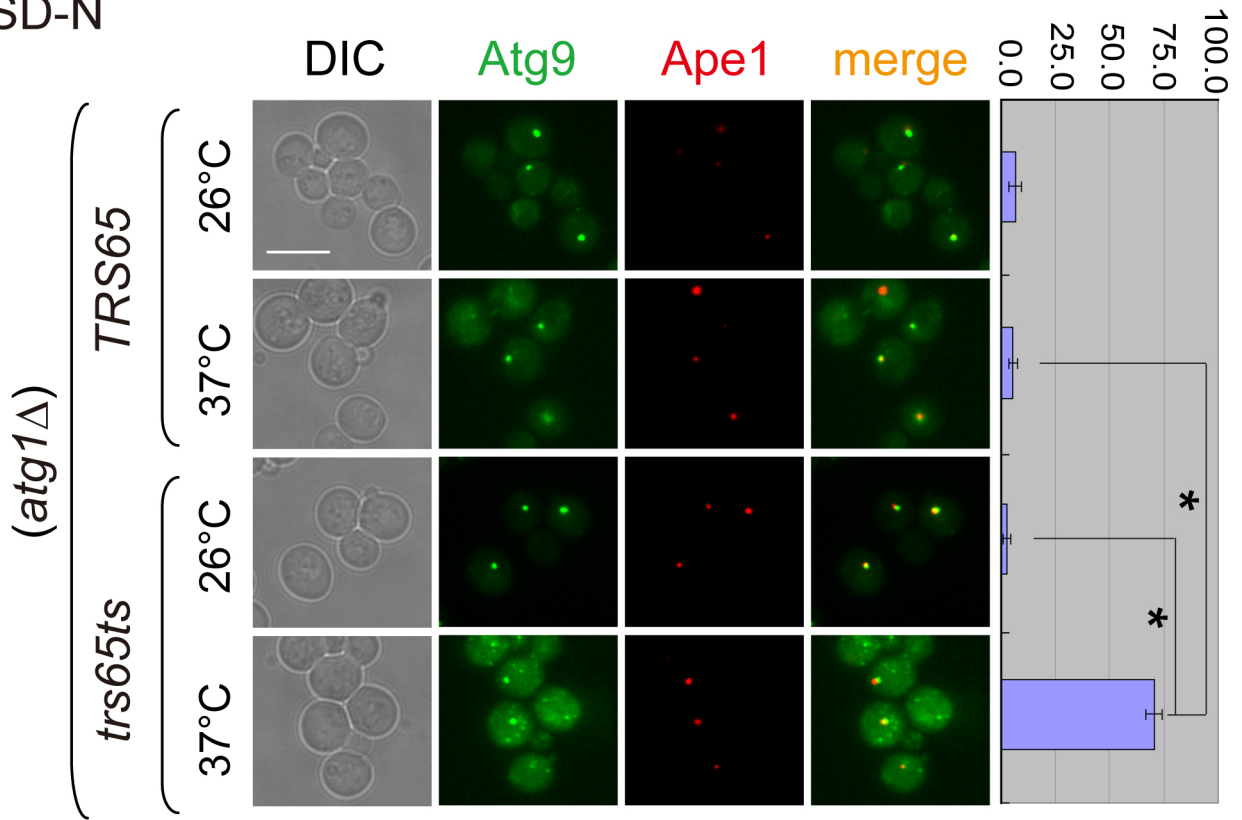

**Figure S3. Anterograde transport of Atg9 to the PAS is altered in *trs65ts* mutant cells at the restrictive temperature.** WT and *trs65ts* mutant cells tagged with Atg9-3XGFP and RFP-Ape1 in an *atg1Δ* background were incubated as described in [Figure 4](#) and examined for fluorescence. **(A)** Non-starvation. **(B)** Starvation. Bar, 7  $\mu$ m. Data are presented as in [Figure 4](#). Asterisks indicate  $P < 0.001$  as highly significant.

Figure S4

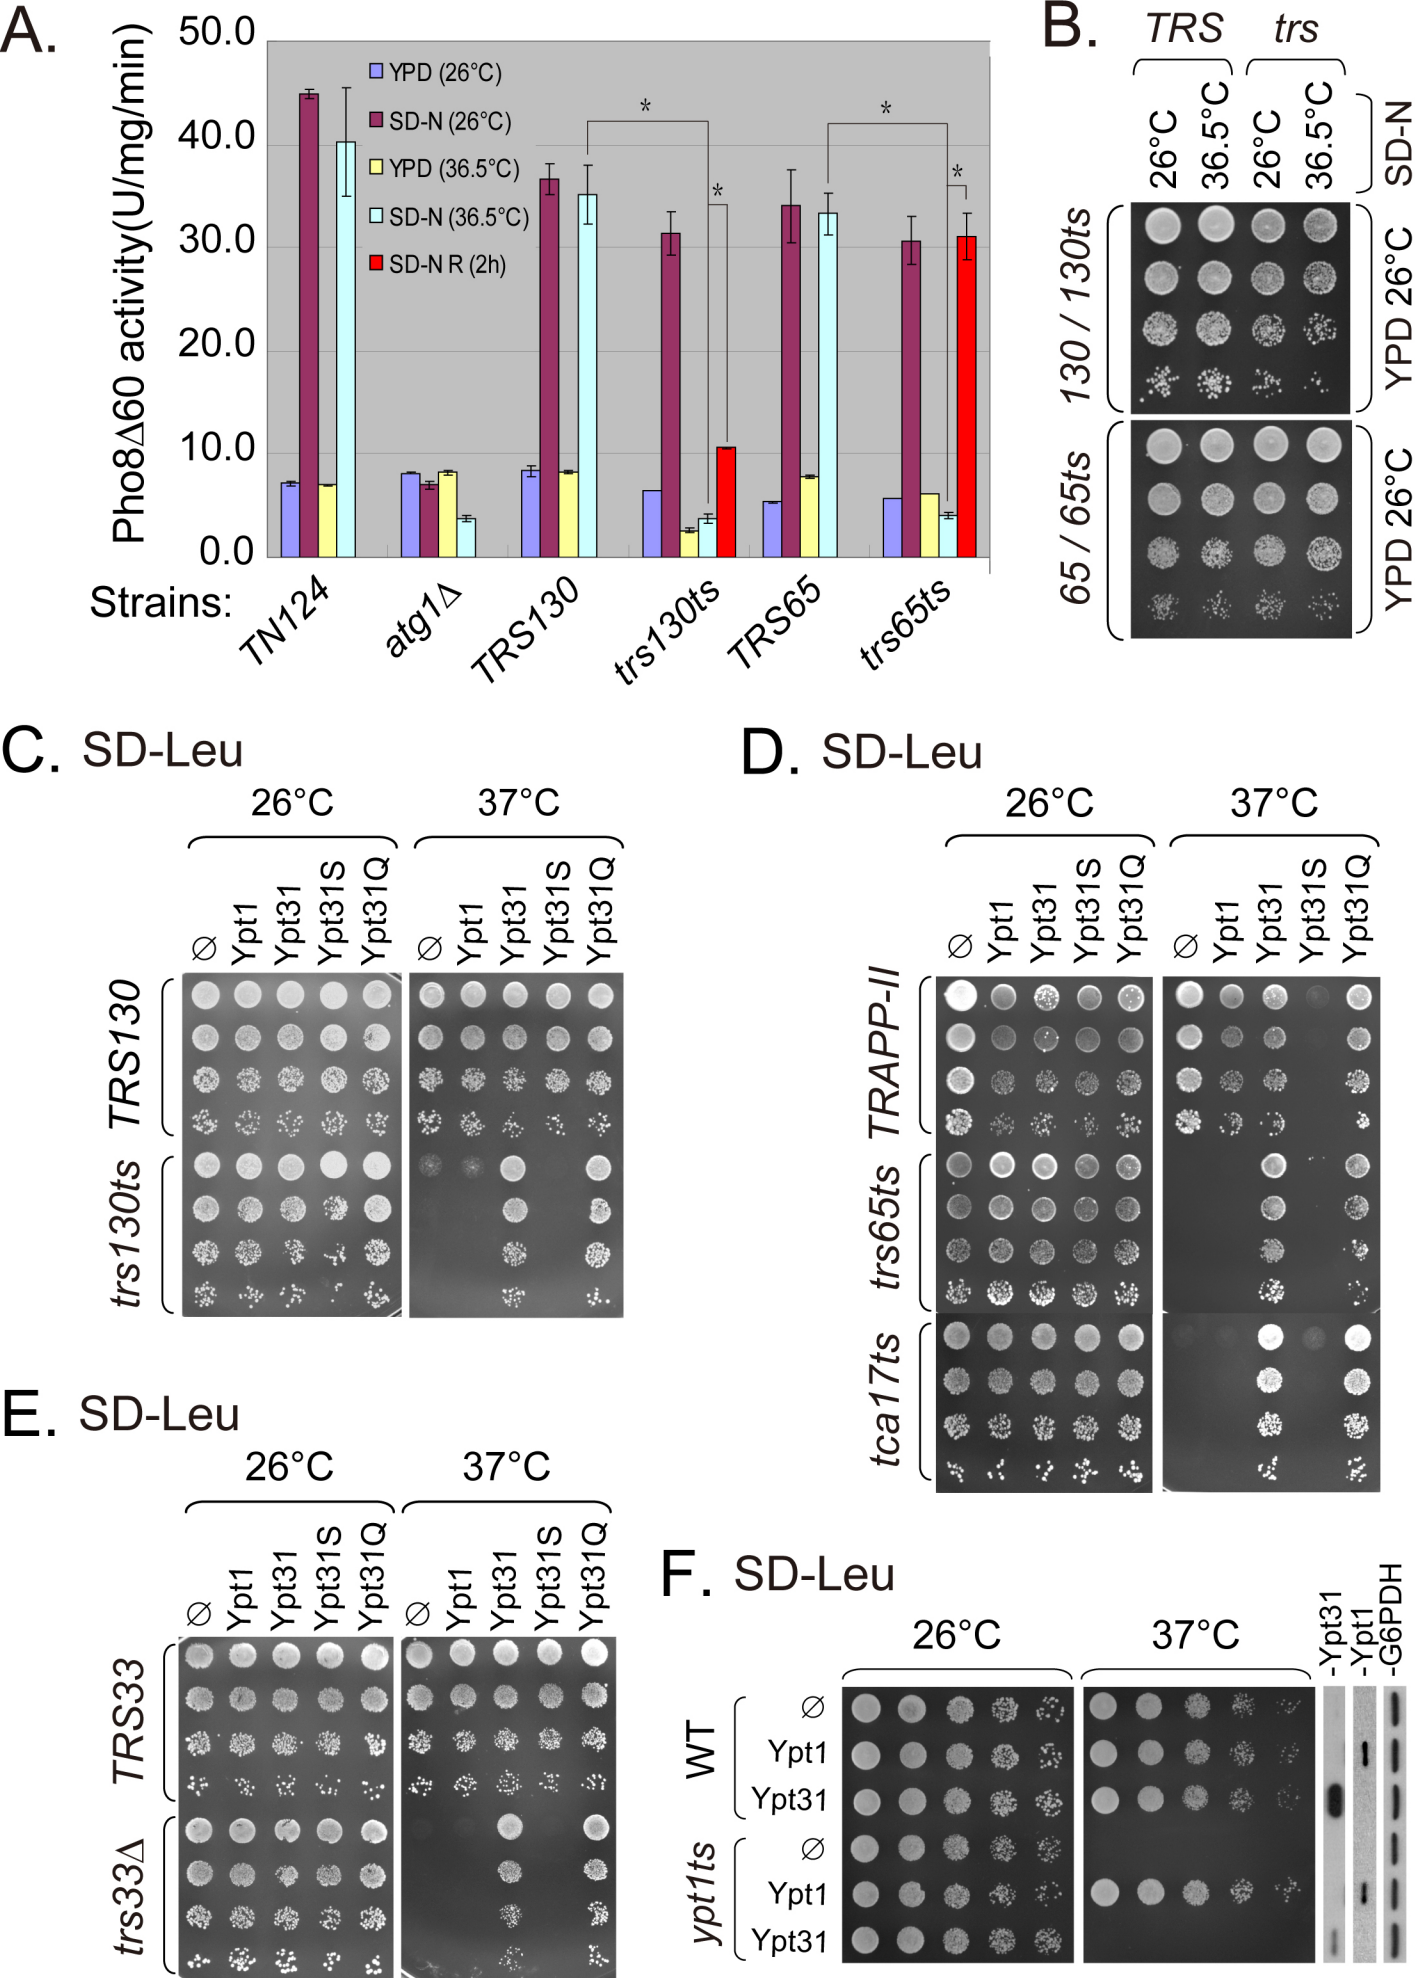

**Figure S4. Changes in autophagic flux in some TRAPP II-specific subunit mutants and suppression of growth defects in mutants by Ypt31. (A)** Pho8 $\Delta$ 60 activity in *trs130ts* and *trs65ts* mutants. WT (TN124) and the *atg1 $\Delta$*  (in *TRS130* background) strains were used as positive and negative controls. All cells were treated as in [Figures 1B](#) except that 36.5°C was used to guarantee that the *trs130ts* cells would be viable after treatment since the mutants in the TN124 background were more temperature sensitive than the strains in [Figures 1A and S1A](#). The *trs130ts* and *trs65ts* mutants were transferred from 36.5°C in SD-N to 26°C in SD-N for 2 hours recovery and designated SD-N R (2h). Pho8 $\Delta$ 60 assay data are presented as in [Figure 7B](#) except with absolute values because of slightly lower Pho8 $\Delta$ 60 activity in *TRS130* than in TN124. Asterisks indicate  $P < 0.001$  as highly significant. **(B)** The *trs130ts* and *trs65ts* mutants were viable after treatment at 36.5°C in SD-N for 2 hours. WT and the mutants incubated in SD-N at 26°C and 36.5°C for 2 hours were plated on YPD plates with tenfold serial dilution from top to bottom and grown at 26°C for 2 days. **(C)-(E)** Cells as in [Figures 7 and S1](#) but without RFP-Ape1 tagging were transformed with the indicated plasmids to examine growth. Cells were spotted onto SD-Leu medium with tenfold serial dilution from top to bottom and grown at various temperatures. Ypt31 (WT and GTP-bound form) but not Ypt1 suppressed the growth defect of *trs130ts* mutant cells **(C)**, *trs65ts* and *tca17ts* mutant cells **(D)**, and *trs33 $\Delta$*  mutant cells **(E)** at 37°C. **(F)** The Ypt1 plasmid in (C)-(E) was used to overexpress Ypt1 in *ypt1ts* to confirm expression and function. Ypt31 served as a negative control. Growth was checked as in (C) and protein expression was examined as in [Figure 7C](#).

Figure S5

A. SD-Leu

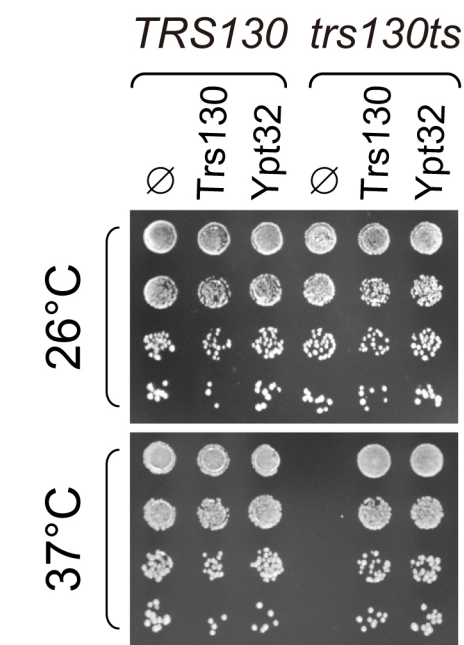

C. SD-Leu

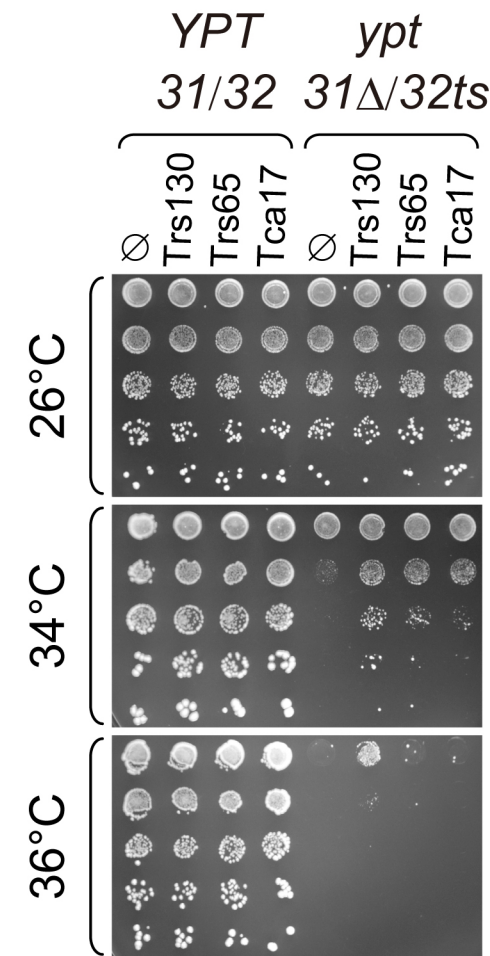

B. 37°C

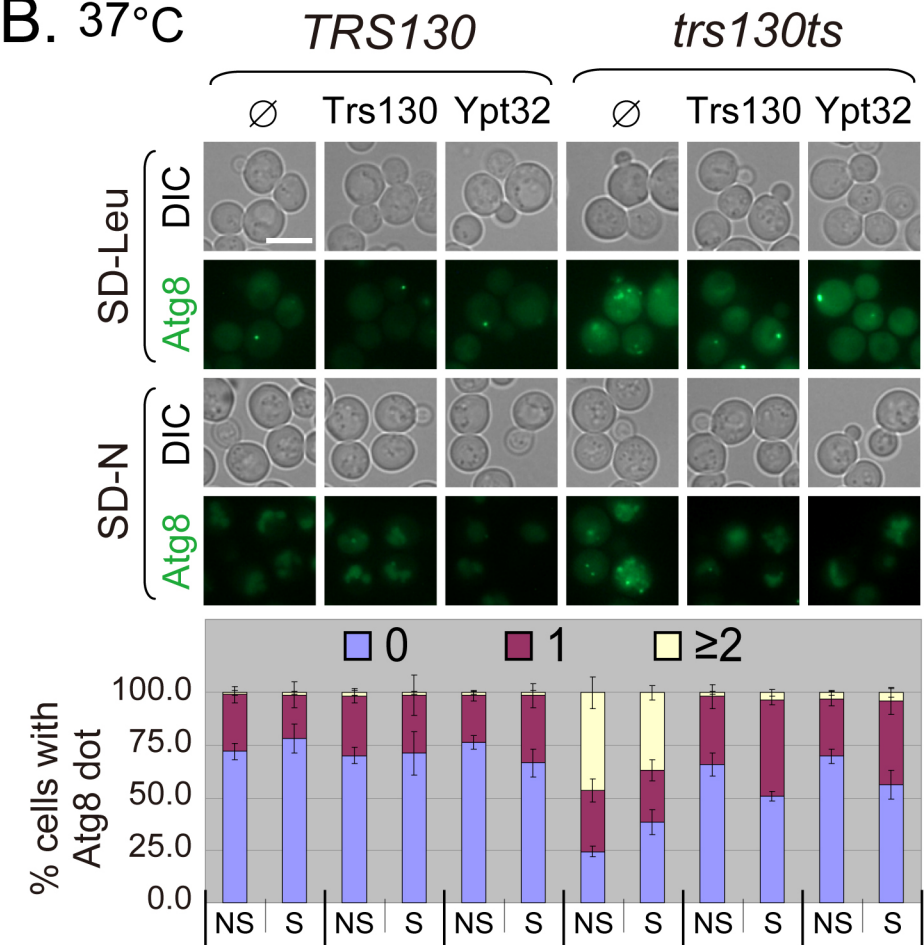

D.

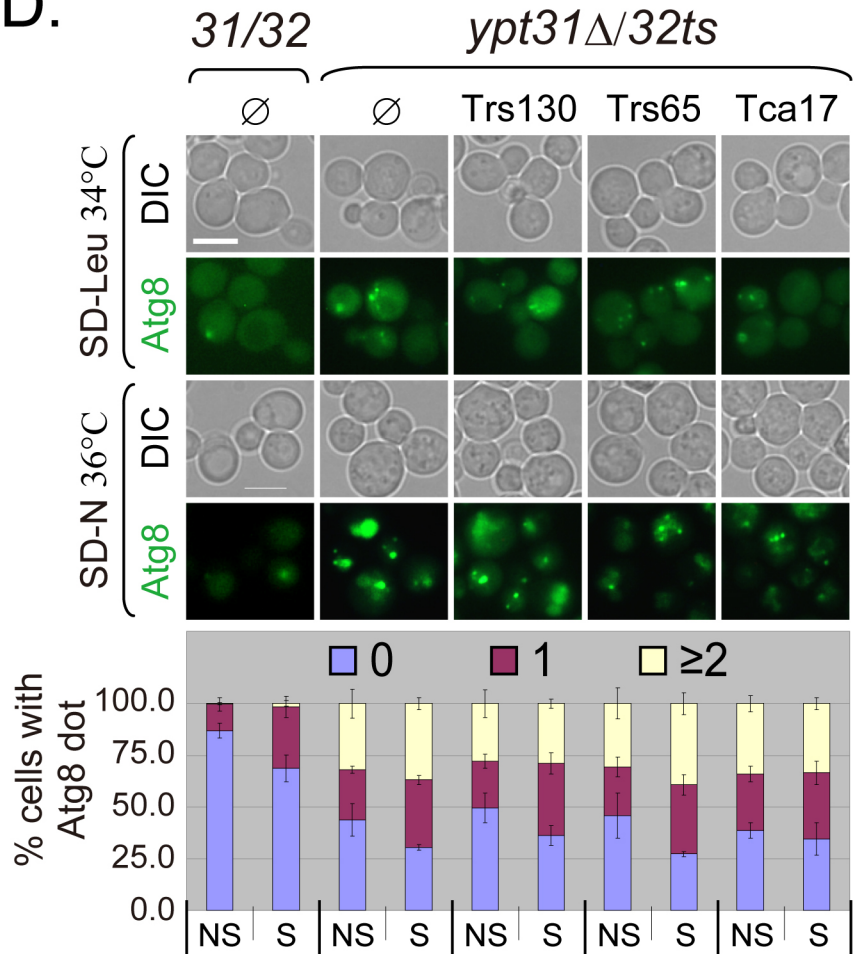

**Figure S5. Ypt32 fully suppresses growth and autophagy defects in *trs130ts* mutant cells, but TRAPP II subunits suppress *ypt31Δ/32ts* growth defects weakly. (A)** Trs130 and Ypt32 suppress the growth defect in *trs130ts* mutant cells at the restrictive temperature. Trs130 and Ypt32 in YEp351 were transformed into WT and *trs130ts* mutant cells tagged with GFP-Atg8 and grown as in [Figure S4C](#). **(B)** Trs130 and Ypt32 suppressed the GFP-Atg8 transport defect in *trs130ts* cells. Yeast transformants as in (A) were investigated to determine whether Trs130 and Ypt32 suppressed the GFP-Atg8 transport defect in *trs130ts* cells in synthetic minimal medium (SD-Leu) or starvation medium (SD-N) at the restrictive temperature. Bar, 5 μm. The percentage of cells with Atg8 dots was quantitated and presented as in [Figure 1A](#). **(C)** TRAPP II-specific subunits (Trs130, Trs65 and Tca17) weakly suppressed the growth defect in *ypt31Δ/32ts* mutant cells at the non-permissive temperature (34°C). Trs130, Trs65 and Tca17 in YEp351 (all are functional) were transformed and grown as in [Figure S4C](#). **(D)** TRAPP II-specific subunits (Trs130, Trs65 and Tca17) did not obviously suppress the GFP-Atg8 transport defect in *ypt31Δ/32ts* cells. Yeast transformants as in (C) were investigated to determine whether TRAPP II-specific subunits suppressed the GFP-Atg8 transport defect in *ypt31Δ/32ts* cells in synthetic minimal medium (SD-Leu) at a growth suppression temperature (34°C) or in starvation medium (SD-N) at a temperature at which GFP-Atg8 transport starts to show defects (36°C). Bar, 5 μm. The percentage of cells with Atg8 dots was quantitated and presented as in [Figure 1A](#).
